# Supplementary material for: Evolutionary analysis reveals regulatory and functional landscape of coding and non-coding RNA editing
Source: PubMed Central journal article supplement (PMC5319793; doi:10.1371/journal.pgen.1006563), 2017-02-06
Supplement: pgen.1006563.s004.pdf [file pgen.1006563.s004.pdf]

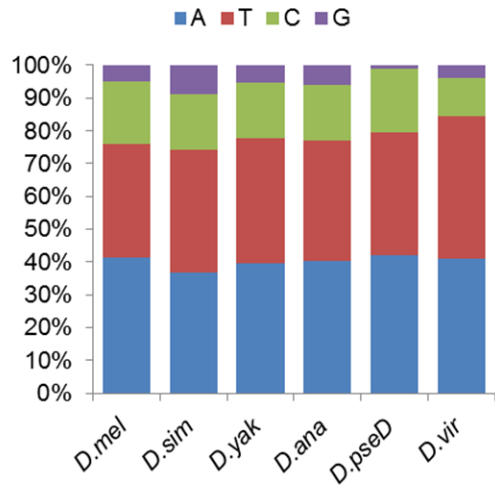

Upstream

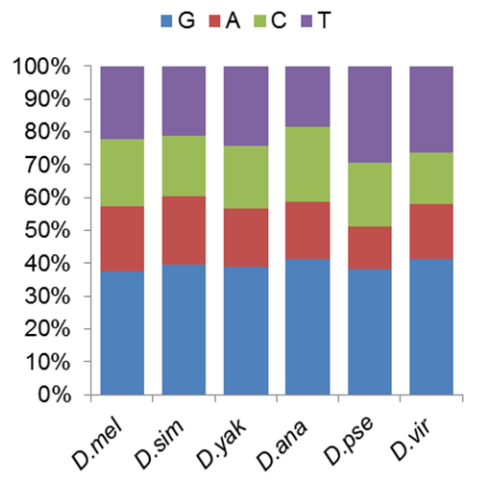

Downstream
